# Supplementary material
Source: PubMed Central journal article supplement (PMC3195575)
Supplement: supp_M111.266064_jbc.M111.266064-1.pdf [file supp_M111.266064_jbc.M111.266064-1.pdf]

## Supplemental information

**Supplemental Table I: List of primers used for PCR analysis**

| <b>RT-PCR</b>                        |                           |                          |                      |
|--------------------------------------|---------------------------|--------------------------|----------------------|
| <b>Gene product</b>                  | <b>Forward primer</b>     | <b>Reverse primer</b>    | <b>Accession no.</b> |
| <b>Mouse TRAIL</b>                   | 5`- CCCTGCTTGCAGGTTAAGAG  | 5`- GGCCTAAGGTCTTTCCATCC | U37522               |
| <b>Mouse TNF-<math>\alpha</math></b> | 5`- CGTCAGCCGATTTGCTATCT  | 5`- CGGACTCCGCAAAGTCTAAG | M11731               |
| <b>Mouse PPAR<math>\gamma</math></b> | 5`- CCCTGGCAAAGCATTGTAT   | 5`- GAAACTGGCACCCCTGAAAA | U09138               |
| <b>Mouse FasL</b>                    | 5`- catcacaaccactcccactg  | 5`- gttctgccagttccttctgc | NM_010177            |
| <b>Mouse GAPDH</b>                   | 5`- AACTTTGGCATTGTGGAAGG  | 5`- ACACATTGGGGTAGGAACA  | M32599               |
| <b>Q-real time PCR</b>               |                           |                          |                      |
| <b>Human TRAIL</b>                   | 5`-cctcagagagtagcagctcaca | 5`- gccagagccttttcattc   | U57059               |
| <b>Human GAPDH</b>                   | 5`- agccacatcgctcagacac   | 5`- gcccaatacgaccaaattcc | X01677               |
| <b>TRAIL promoter</b>                | 5`- ctcccaccctcacagtagc   | 5`- gggagggattttctttgctt | AF178756             |

**Supplemental Table II: List of oligonucleotides used for DNA pull-down assay**

| <b>Name</b>        | <b>Forward oligomer</b>       | <b>Reverse oligomer</b> |
|--------------------|-------------------------------|-------------------------|
| <b>PPRE PC</b>     | 5`-biotin-CCTAGGTCAAAGGTCAGCC | 5`- GGCTGACCTTTGACCTAGG |
| <b>TRAILp PPRE</b> | 5`-biotin-TGGAAGTTTCAGGTCATAA | 5`- TTATGACCTGAAACTTCCA |
| <b>PPRE-m</b>      | 5`-biotin-TGGAACATTCAGGTCATAA | 5`- TTATGACCTGAATGTTCCA |
|                    |                               |                         |

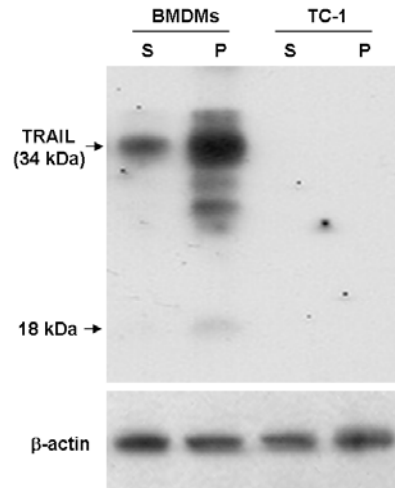

Supplemental Fig. S1. BMDMs and TC-1 cells were separately treated with 200 ng/ml PEDF for 24 h, and then processed for western blot analysis with anti-TRAIL antibody. Equal protein loading was confirmed by reprobng the membranes with a  $\beta$ -actin antibody.

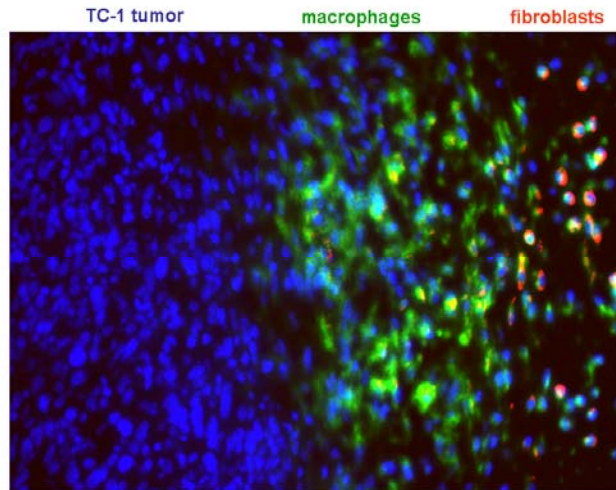

Supplemental Fig. S2. Distribution of macrophages and fibroblasts in TC-1 tumor. C57BL/6 mice were inoculated subcutaneously with  $1 \times 10^6$  TC-1 cells into their left flanks. At day 21, TC-1 tumors were harvested and tumor sections were immunohistochemical double-stained for F4/80 (marker for macrophages; *green*) and vimentin (marker for fibroblast; *red*) (sc-373717; Santa Cruz Biotechnology). Original magnification, X 200. Representative photographs revealed that macrophages are assembled in vicinity to TC-1 tumor core, while fibroblasts are distant to TC-1 tumor core.

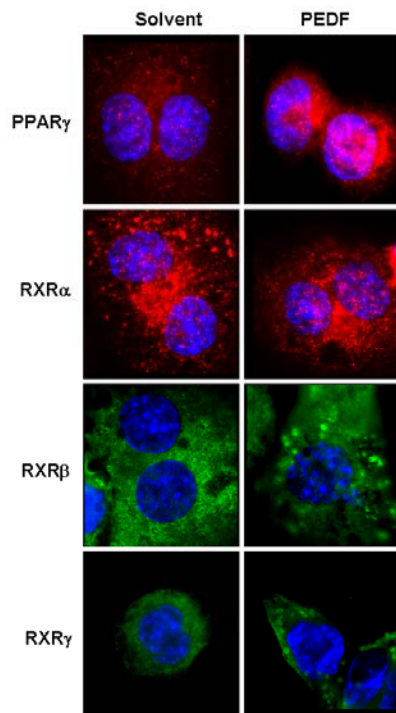

Supplemental Fig. S3. Localization of PPAR $\gamma$  and RXR isoforms in subconfluent THP-1 macrophages. Cells were left untreated or treated with 200 ng/ml PEDF for 24 h. Cells were then stained with specific antibodies including PPAR $\gamma$  (sc-7273; Santa Cruz Biotechnology), RXR $\alpha$  (sc-46659; Santa Cruz Biotechnology), RXR $\beta$  (GTX89670; GenTex) and RXR $\gamma$  (GTX15518; GenTex), followed by incubation with appropriately rhodamine- or FITC-conjugated second antibody. Nuclei were monitored by counterstaining with Hoechst 33342. After final washes and mounting, cells were viewed with a Zeiss epifluorescence microscope ( $\times 1000$ ). Representative images from three independent experiments.
